# Supplementary material for: Faster-X Evolution of Gene Expression in Drosophila
Source: PLOS journal article supplement (doi:10.1371/journal.pgen.1003013), 2012-10-11

**A**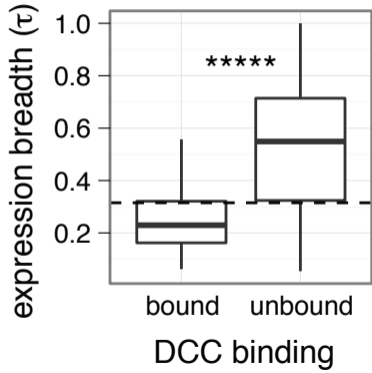**B**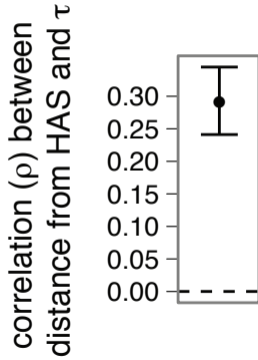

Supplement: S13 (10.1371/journal.pgen.1003013.s013) [file journal.pgen.1003013.s013]
