# Supplementary material for: Faster-X Evolution of Gene Expression in Drosophila
Source: PLOS journal article supplement (doi:10.1371/journal.pgen.1003013), 2012-10-11
Supplement: S19 (10.1371/journal.pgen.1003013.s019) [file journal.pgen.1003013.s019]

| DCC.cell.line | DCC     | chr.cell.line | chr.state  | num_genes | FET.p                    |
|---------------|---------|---------------|------------|-----------|--------------------------|
| SL2           | bound   | S2            | active     | 442       | 5.39 x 10 <sup>-50</sup> |
| SL2           | unbound | S2            | active     | 622       |                          |
| SL2           | bound   | S2            | repressive | 3         |                          |
| SL2           | unbound | S2            | repressive | 271       |                          |
| Any           | bound   | S2            | active     | 694       | 8.11 x 10 <sup>-91</sup> |
| Any           | unbound | S2            | active     | 370       |                          |
| Any           | bound   | S2            | repressive | 7         |                          |
| Any           | unbound | S2            | repressive | 267       |                          |
| Bachtrog      | bound   | S2            | active     | 769       | 1.05 x 10 <sup>-97</sup> |
| Bachtrog      | unbound | S2            | active     | 295       |                          |
| Bachtrog      | bound   | S2            | repressive | 15        |                          |
| Bachtrog      | unbound | S2            | repressive | 259       |                          |
| SL2           | bound   | BG3           | active     | 443       | 1.24 x 10 <sup>-49</sup> |
| SL2           | unbound | BG3           | active     | 630       |                          |
| SL2           | bound   | BG3           | repressive | 2         |                          |
| SL2           | unbound | BG3           | repressive | 263       |                          |
| Any           | bound   | BG3           | active     | 696       | 1.19 x 10 <sup>-90</sup> |
| Any           | unbound | BG3           | active     | 377       |                          |
| Any           | bound   | BG3           | repressive | 5         |                          |
| Any           | unbound | BG3           | repressive | 260       |                          |
| Bachtrog      | bound   | BG3           | active     | 767       | 8.49 x 10 <sup>-90</sup> |
| Bachtrog      | unbound | BG3           | active     | 306       |                          |
| Bachtrog      | bound   | BG3           | repressive | 17        |                          |
| Bachtrog      | unbound | BG3           | repressive | 248       |                          |
